# Supplementary material for: Reduction-Hypersensitive Podophyllotoxin Prodrug Self-Assembled Nanoparticles for Cancer Treatment
Source: MDPI journal article supplement (doi:10.3390/pharmaceutics15030784), 2023-02-27
Supplement: s1 [file s1]

## **Supplementary Materials**

### **Reduction-Hypersensitive Podophyllotoxin Prodrug Self-Assembled Nanoparticles for Cancer Treatment**

**Xinhui Wang<sup>†</sup>, Yuequan Wang<sup>†</sup>, Jiaxin Yu, Qian Qiu, Rui Liao, Shenwu Zhang, Cong Luo<sup>\*</sup>**

#### **Affiliations:**

Department of Pharmaceutics, Wuya College of Innovation, Shenyang Pharmaceutical University,  
Shenyang 110016, China

<sup>†</sup> These authors contributed equally to this work.

#### **\* Corresponding authors:**

Cong Luo, Ph.D.

Department of Pharmaceutics, Wuya College of Innovation, Shenyang Pharmaceutical University,  
Shenyang 110016, China

Tel: +86-24-23986321; Fax: +86-24-23986321

E-mail: [luocong@syphu.edu.cn](mailto:luocong@syphu.edu.cn)

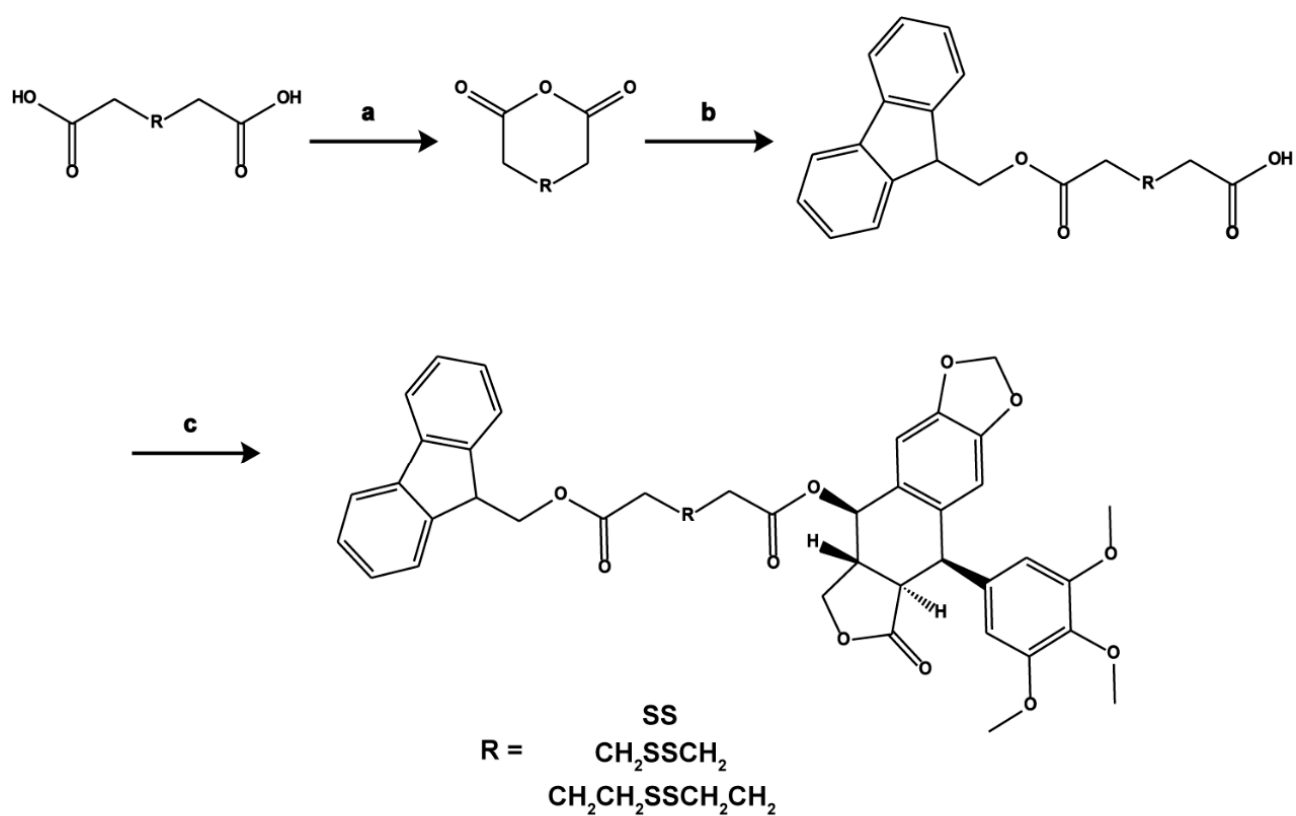

(a): acetic anhydride, 25°C; (b): 9-fluorene methanol, DMAP, 25°C; (c): EDCI, HoBt, DMAP, 0°C; PPT, 25°C.

**Figure S1.** Synthetic route of designed disulfide bond-bridged PPT prodrugs.

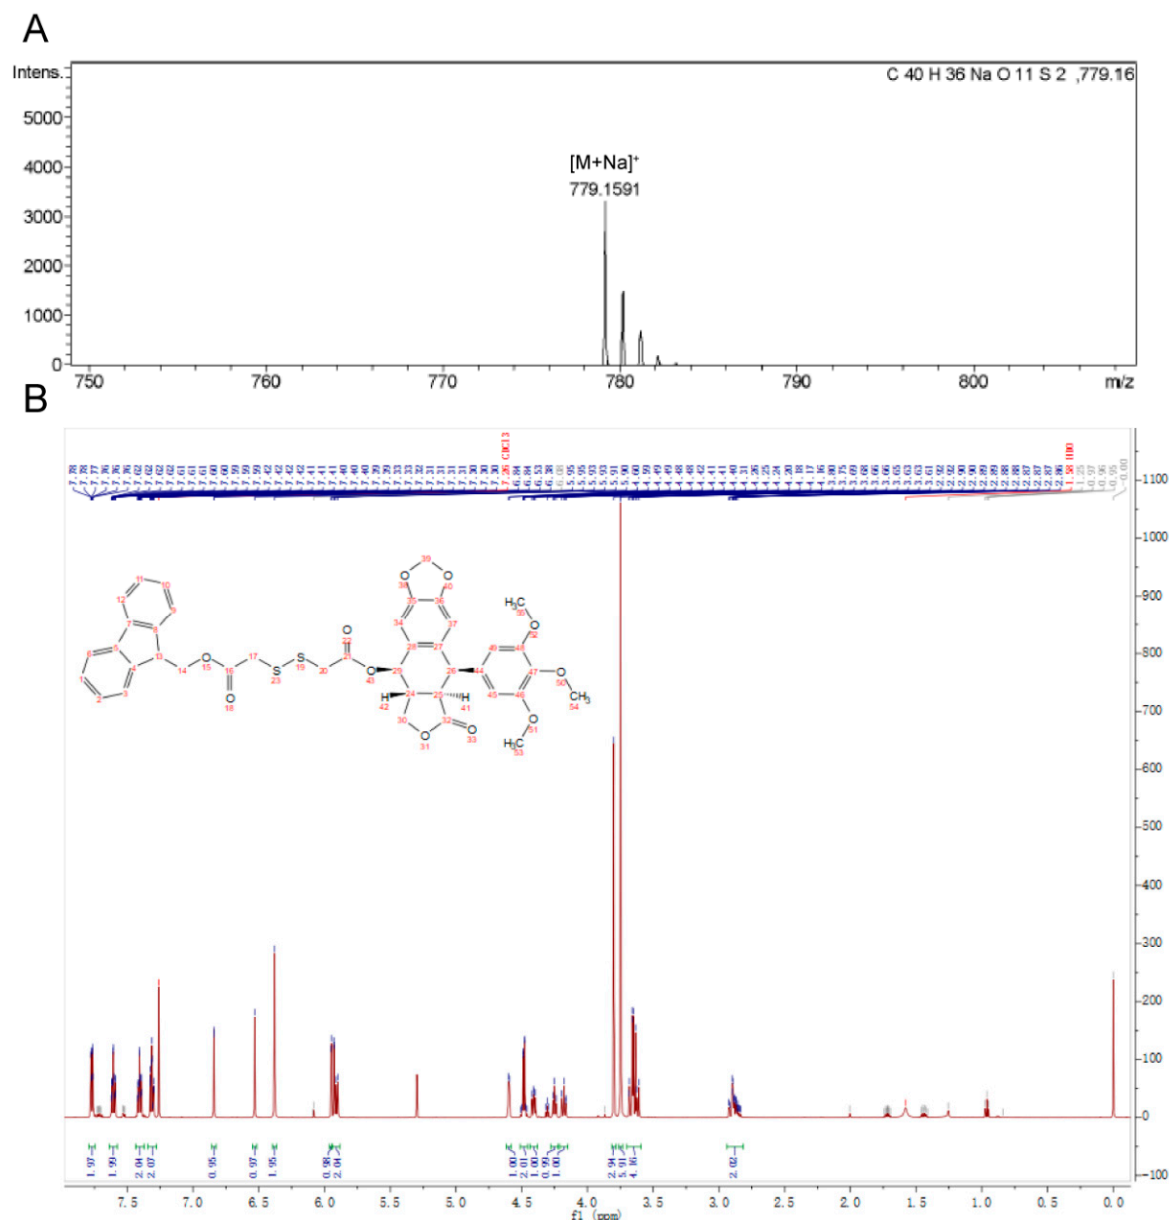

**Figure S2.** (A) MS and (B)  $^1\text{H}$  NMR of FAP.  $[M+Na]^+=779.16$ ,  $^1\text{H}$  NMR (600 MHz, Chloroform- $d$ )  $\delta$  7.77 (dt,  $J = 7.6, 0.9$  Hz, 2H, 6, 12), 7.61 (tq,  $J = 7.5, 0.9$  Hz, 2H, 1, 11), 7.41 (tq,  $J = 7.5, 0.9$  Hz, 2H, 2, 10), 7.31 (tt,  $J = 7.4, 0.9$  Hz, 2H, 3, 9, 34), 6.84 (d,  $J = 0.7$  Hz, 1H, 37), 6.53 (s, 1H, 29), 6.38 (s, 2H, 45, 49), 5.95 (d,  $J = 1.4$  Hz, 1H, 13), 5.94 – 5.88 (m, 2H, 39), 5.30 (s, 0H), 4.60 (d,  $J = 4.0$  Hz, 1H, 26), 4.48 (dd,  $J = 7.2, 1.1$  Hz, 2H, 14), 4.41 (dd,  $J = 9.2, 6.4$  Hz, 1H, 42), 4.25 (t,  $J = 7.1$  Hz, 1H, 30'), 4.21 – 4.15 (m, 1H, 30''), 3.80 (s, 2H, 17), 3.75 (s, 6H, 53, 55), 3.70 – 3.59 (m, 4H, 20', 54), 2.94 – 2.82 (m, 2H).

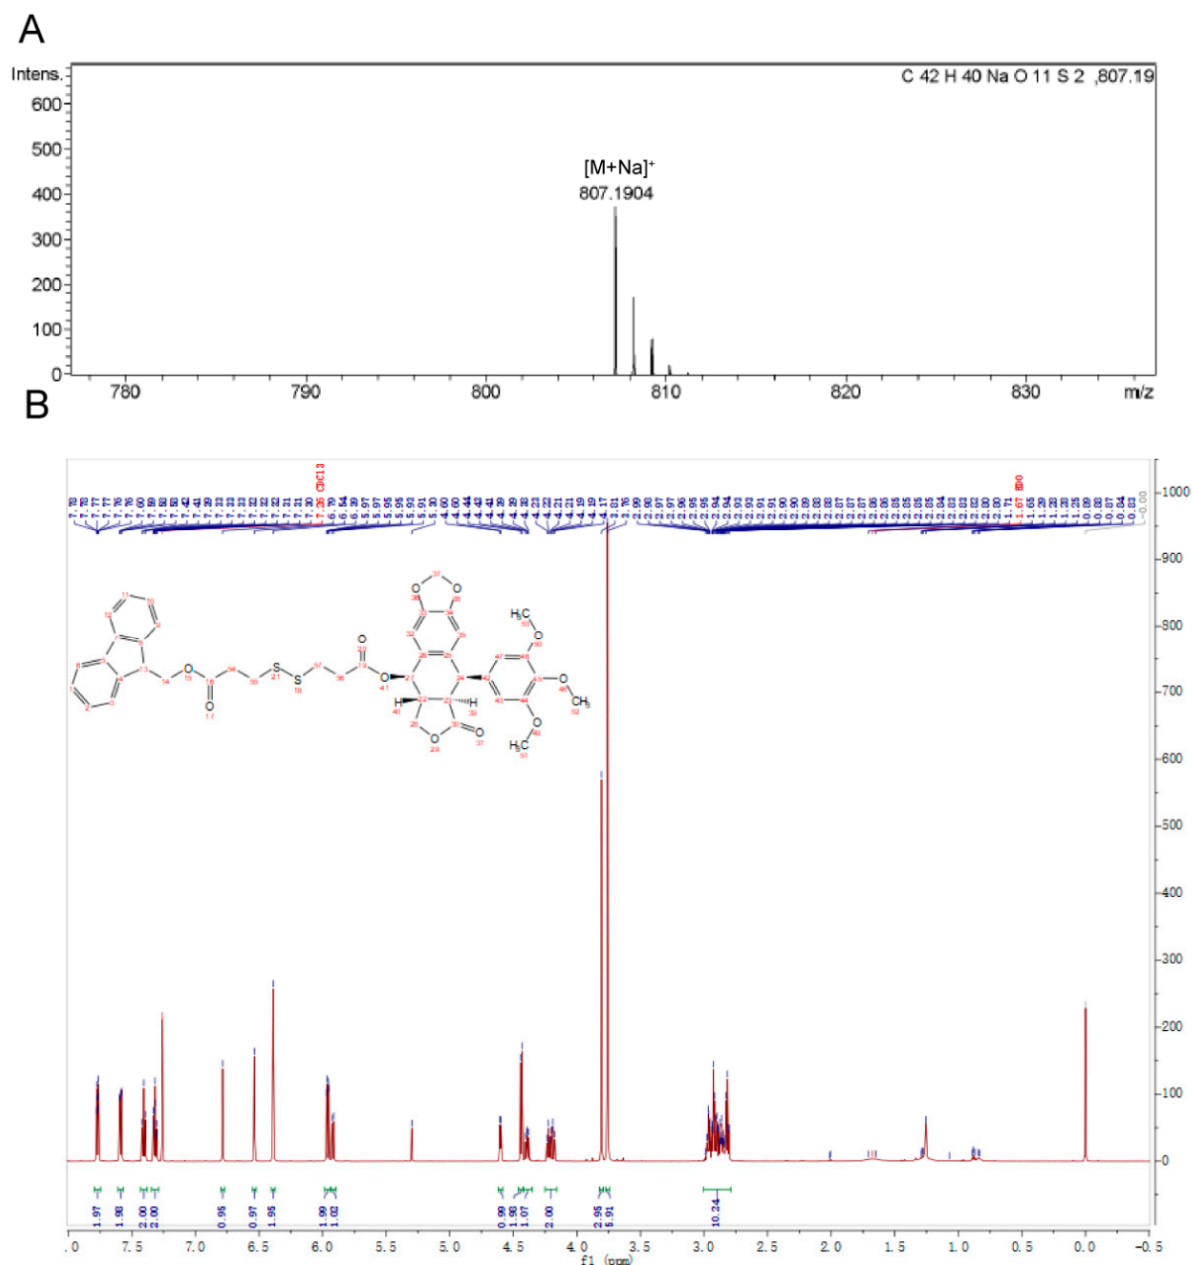

**Figure S3.** (A) MS and (B)  $^1\text{H}$  NMR of FBP.  $[M+Na]^+=807.19$ ,  $^1\text{H}$  NMR (600 MHz, Chloroform-*d*)  $\delta$  7.77 (dt,  $J = 7.6, 0.9$  Hz, 2H, 3, 9), 7.59 (dd,  $J = 7.5, 1.1$  Hz, 2H, 6, 12), 7.41 (t,  $J = 7.5$  Hz, 2H, 1, 11), 7.32 (tt,  $J = 7.4, 1.0$  Hz, 2H, 2, 10), 6.79 (s, 1H, 35), 6.54 (s, 1H, 32), 6.39 (s, 2H, 37', 43, 47), 5.96 (dd,  $J = 9.5, 1.4$  Hz, 2H, 13, 27, 37''), 5.92 (d,  $J = 9.1$  Hz, 1H, 27), 4.60 (d,  $J = 4.4$  Hz, 1H, 24), 4.44 (d,  $J = 7.1$  Hz, 2H, 14), 4.39 (dd,  $J = 9.3, 6.9$  Hz, 1H, 40), 4.25 – 4.16 (m, 2H, 28), 3.81 (s, 3H, 52), 3.76 (s, 6H, 51, 53), 3.00 – 2.79 (m, 10H, 39, 54, 55, 56, 57), 1.25 (s, 1H, ).

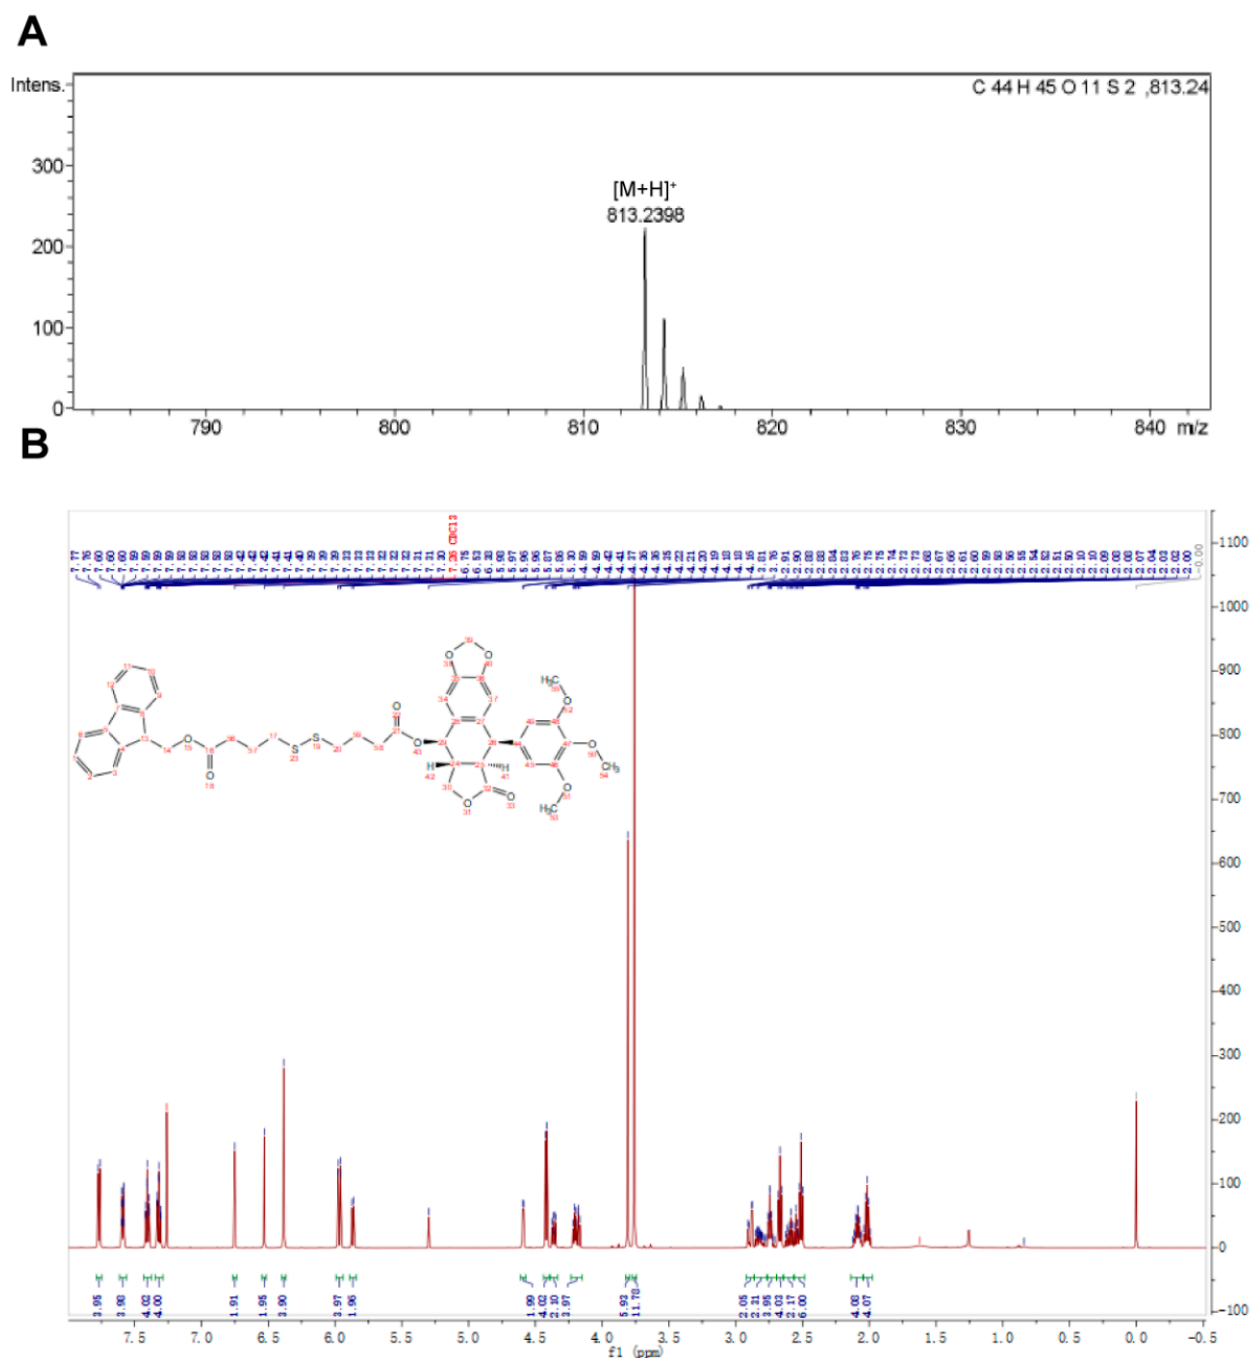

**Figure S4.** (A) MS and (B)  $^1\text{H}$  NMR of FGP.  $[\text{M}+\text{H}]^+=813.24$ ,  $^1\text{H}$  NMR (600 MHz, Chloroform-*d*)  $\delta$  7.77 (d,  $J = 7.5$  Hz, 2H, 6, 12), 7.59 (ddq,  $J = 7.5, 1.8, 0.9$  Hz, 2H, 3, 9), 7.41 (tt,  $J = 7.5, 0.9$  Hz, 2H, 1, 11), 7.32 (tt,  $J = 7.5, 0.8$  Hz, 2H, 2, 10), 6.75 (s, 1H, 37), 6.53 (s, 1H, 34), 6.38 (s, 2H, 45, 49), 5.97 (dd,  $J = 10.9, 1.4$  Hz, 3H, 13, 39), 5.87 (d,  $J = 9.1$  Hz, 1H, 29), 4.59 (d,  $J = 4.4$  Hz, 1H, 26), 4.42 (d,  $J = 7.0$  Hz, 2H, 14), 4.36 (dd,  $J = 9.3, 6.9$  Hz, 1H, 42), 4.23 – 4.15 (m, 2H, 30), 3.81 (s, 3H, 54), 3.76 (s, 6H, 53, 55), 2.89 (dd,  $J = 14.5, 4.4$  Hz, 2H, 58', 58''), 2.86 – 2.76 (m, 1H, 41), 2.74 (td,  $J = 6.9, 2.1$  Hz, 2H, 41, 58''), 2.67 (t,  $J = 7.1$  Hz, 2H, 56), 2.60 (dt,  $J = 16.5, 7.3$  Hz, 2H, 17), 2.53 (dt,  $J = 22.9, 7.2$  Hz, 3H, 17, 20'), 2.09 (pd,  $J = 7.1, 2.6$  Hz, 2H, 59), 2.02 (p,  $J = 7.2$  Hz, 2H, 57).

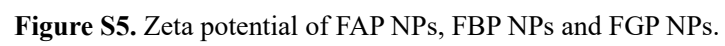

**Figure S5.** Zeta potential of FAP NPs, FBP NPs and FGP NPs.

A

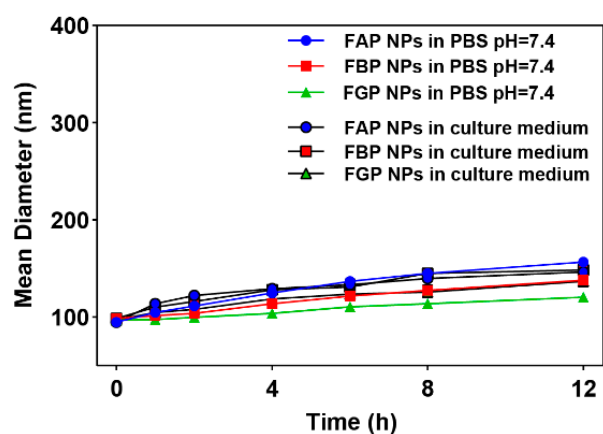

B

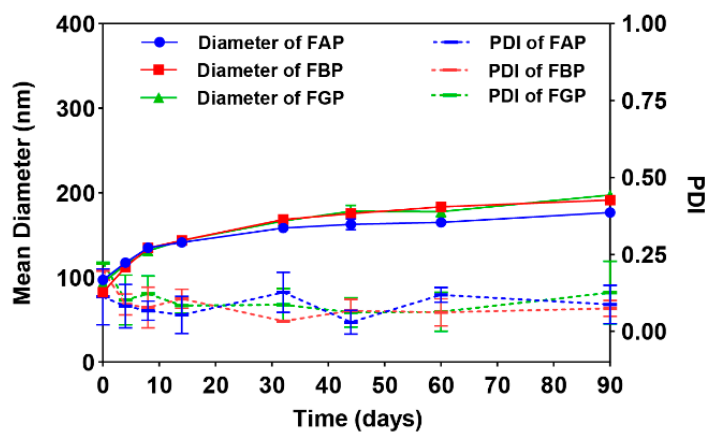

**Figure S6.** (A) Stabilities of prodrug NPs in PBS and RPMI 1640 culture medium (with 10% FBS). (B) Particle size and PDI of prodrug NPs in 90 days.

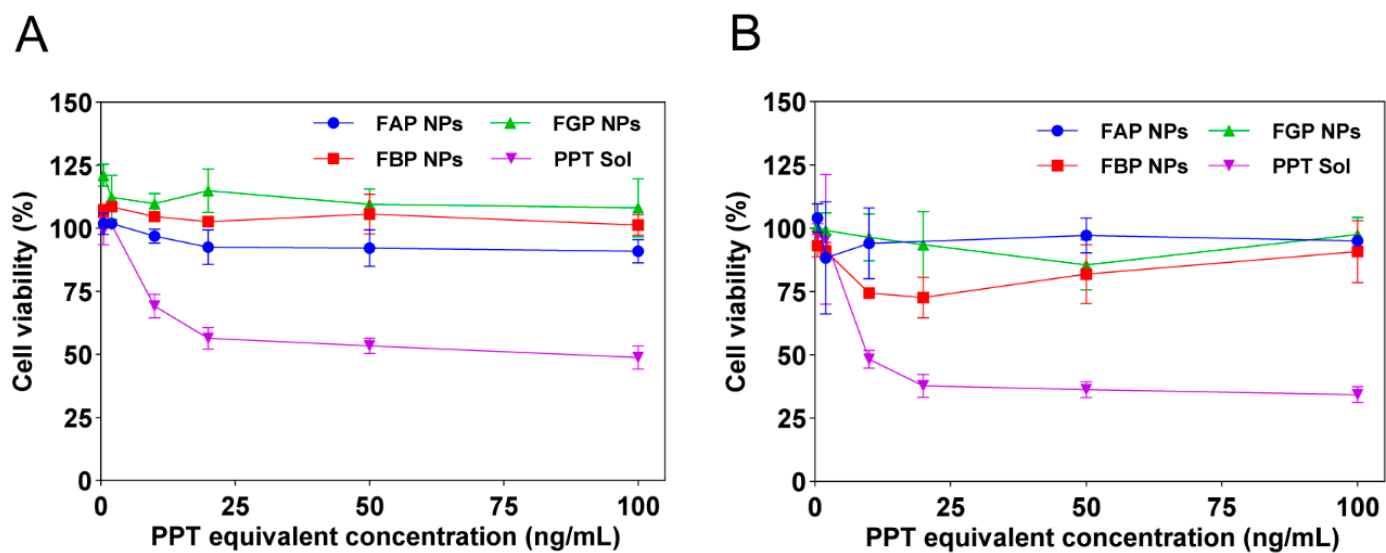

**Figure S7.** Viability of 3T3 cells after treated with various concentrations of PPT and prodrug NPs for (A) 48 h and (B) 72 h.

Data are presented as mean  $\pm$  SD (n = 3).



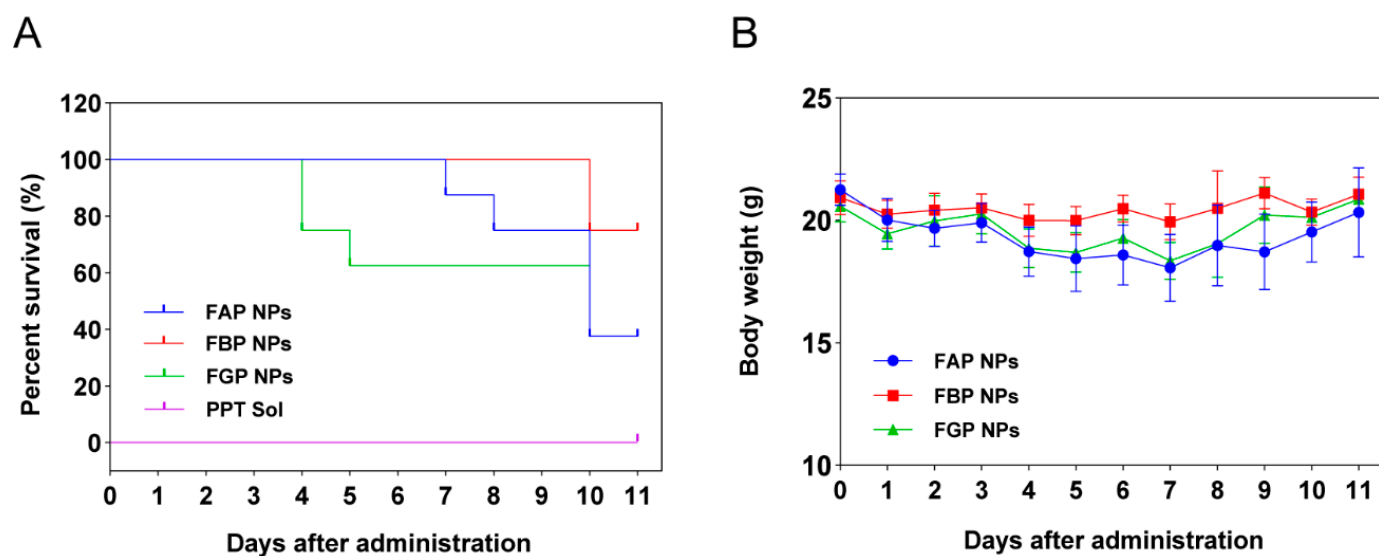

**Figure S8.** (A) Survivorship curve and (B) body weight changes following i.v. injection of prodrug NPs at PPT-equivalent dose in 30 mg/kg (n = 8).

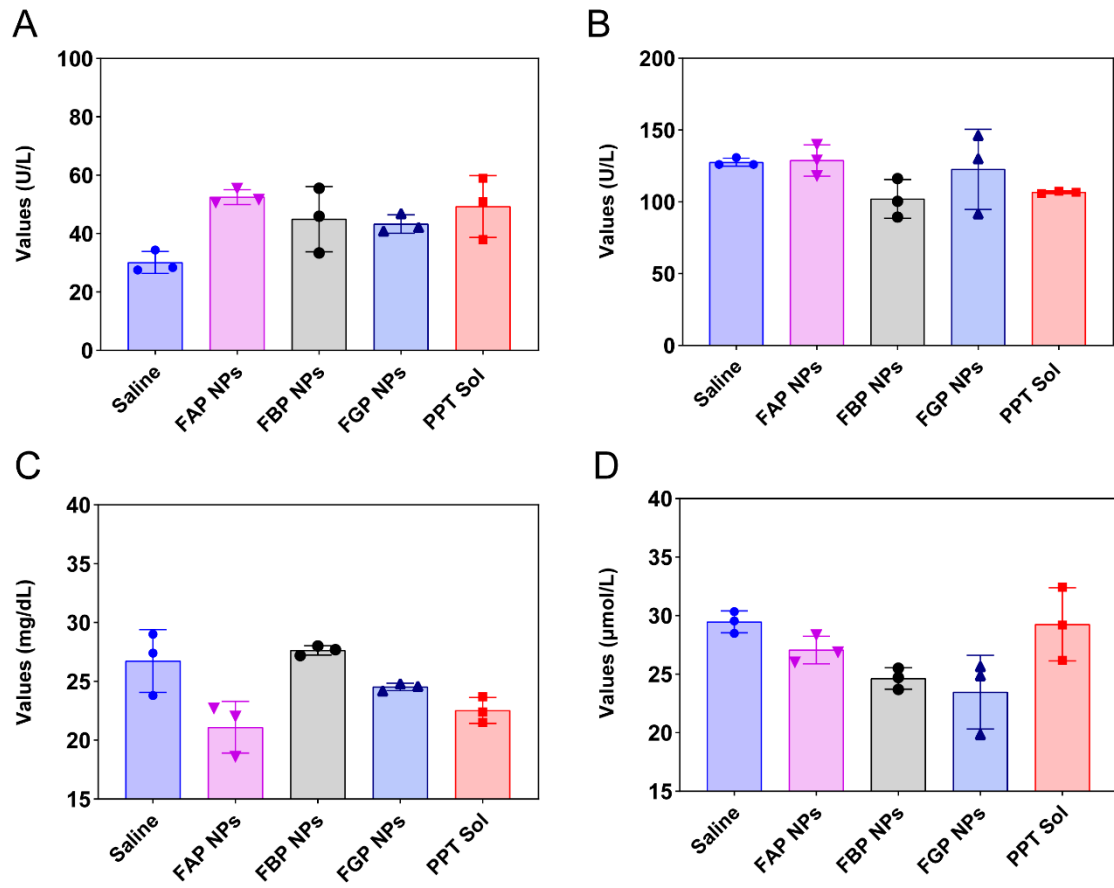

**Figure S9.** Blood analysis of Liver and kidney function at 11 days post administration. (n=3) (A) ALT, (B) AST, (C) BUN and (D) CREA

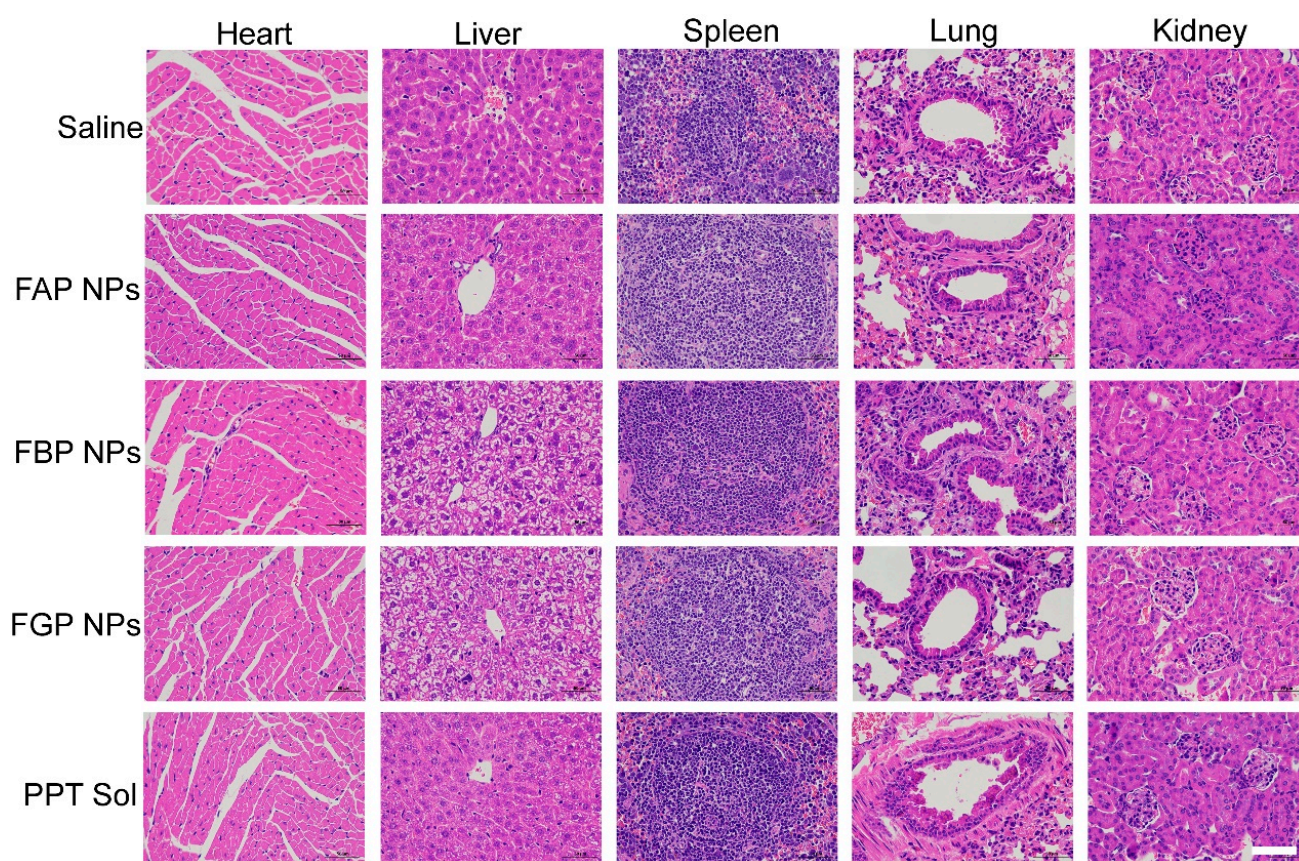

**Figure S10.** H&E staining images of major organ sections after the treatment. (Scale bar = 50  $\mu$ m)

**Table S1.** Characterization of prodrug NPs.

| Formulations | Size (nm)  | PDI       | Zeta potential (mV) | Drug loading (%) |
|--------------|------------|-----------|---------------------|------------------|
| FAP NPs      | 96.39±1.94 | 0.08±0.01 | -31.0±0.8           | 43.8             |
| FBP NPs      | 82.44±0.60 | 0.10±0.04 | -30.4±0.6           | 42.2             |
| FGP NPs      | 77.63±1.22 | 0.13±0.07 | -31.9±2.4           | 40.8             |

**Table S2.** Cytotoxicity (IC<sub>50</sub> values, ng/mL) of PPT solution and prodrug NPs.

| Formulations | 4T1     |       | 3T3     |         |
|--------------|---------|-------|---------|---------|
|              | 48 h    | 72 h  | 48 h    | 72 h    |
| FAP NPs      | 33.0    | 57.6  | 474.2   | 283.7   |
| FBP NPs      | >1000.0 | 611.0 | >1000.0 | >1000.0 |
| FGP NPs      | 695.4   | 470.9 | >1000.0 | >1000.0 |
| PPT Sol      | 3.9     | 3.6   | 94.5    | 20.4    |

**Table S3.** Pharmacokinetic parameters of PPT solution and prodrug NPs (n=6).

| Formulations | Determined | AUC <sub>0-24 h</sub><br>(μmol/L*h) | t <sub>1/2</sub> (h) | MRT <sub>0-24 h</sub> (h) |
|--------------|------------|-------------------------------------|----------------------|---------------------------|
| PPT Sol      | PPT        | 1.67±0.24                           | 0.30±0.07            | 0.31±0.07                 |
| FAP NPs      | FAP        | 5.02±0.37                           | 1.56±2.49            | 0.12±0.01                 |
|              | PPT        | 2.31±0.34                           | 0.37±0.04            | 1.13±0.23                 |
| FBP NPs      | FBP        | 3.99±0.62                           | 0.69±0.77            | 0.17±0.06                 |
|              | PPT        | 0.15±0.05                           | 0.67±0.17            | 0.75±0.27                 |
| FGP NPs      | FGP        | 5.55±1.63                           | 0.82±0.18            | 0.37±0.04                 |
|              | PPT        | 12.51±3.20                          | 1.03±0.50            | 0.12±0.02                 |
